# Supplementary material for: AlloFinder: a strategy for allosteric modulator discovery and allosterome analyses
Source: PubMed Central journal article supplement — Nucleic Acids Res. 2018 May 11;46(Web Server issue):W451–8. doi: 10.1093/nar/gky374 (PMC6030990; doi:10.1093/nar/gky374), 2018-05-11
Supplement: gky374_supplemental_files.pdf [file gky374_supplemental_files.pdf]

## Supplementary Data

### AlloFinder: a strategy for allosteric modulator discovery and allosterome analyses

Min Huang<sup>1,||</sup>, Kun Song<sup>1,||</sup>, Xinyi Liu<sup>1,||</sup>, Shaoyong Lu<sup>1,||</sup>, Qiancheng Shen<sup>1,2</sup>, Renxiao Wang<sup>3</sup>, Jingze Gao<sup>2</sup>, Yuanyuan Hong<sup>2</sup>, Qian Li<sup>2</sup>, Duan Ni<sup>1</sup>, Guoqiang Chen<sup>1</sup>, Jianrong Xu<sup>4</sup>, Jian Zhang<sup>1,2,\*</sup>

<sup>1</sup> Department of Pathophysiology, Key Laboratory of Cell Differentiation and Apoptosis of Chinese Ministry of Education, Shanghai Jiao-Tong University School of Medicine (SJTU-SM), Shanghai, 200025, China.

<sup>2</sup> Medicinal Bioinformatics Center, Shanghai Jiao-Tong University School of Medicine (SJTU-SM), Shanghai, 200025, China.

<sup>3</sup> Shanghai Institute of Organic Chemistry, Chinese Academy of Sciences, Shanghai 200032, China

<sup>4</sup> Department of Pharmacology, Shanghai Jiao-Tong University School of Medicine (SJTU-SM), Shanghai, 200025, China.

**Key Words:** AlloFinder, allosteric modulator, allosteric mechanism, allosteric metabolites

<sup>||</sup>The authors wish it to be known that, in their opinion, the first four authors should be regarded as joint First Authors

**\*To whom correspondence should be addressed:**

Dr. Jian Zhang, PhD

Tel: +86-21-63846590-776922

Fax: +86-21-64154900

E-mail: jian.zhang@sjtu.edu.cn

## **Materials and Methods**

### **Ligand library construction**

Ligand libraries used for virtual screening are provided, particularly for the availability of chemical compounds from commercial sources, including ChEMBL, SPECS, NCI Open Chemical Repository, and for-sale subset from ZINC. These pre-built ligand libraries were generated by the following procedures. First, both drug-like and allo-like filters were performed to rule out molecules with undesired physicochemical and allosteric properties. The drug-like parameters are used as follows: H-bond donors  $< 5$ , H-bond acceptors  $< 10$ , molecular weight  $< 650$ , LogP  $< 5$ , and rotatable bonds  $\leq 7$ . The allo-like parameter is number of rings in the largest ring system = 1 or 2. In addition to the four libraries, Endogenous Ligands from ZINC are also provided without the filters. To guarantee chemical diversity, the molecules for each library were then clustered using the K-medoids algorithm and the Morgan fingerprint with a maximum distance of Tanimoto coefficient of 0.3 in the clusters. The cluster centroids were retained to constitute the diverse ligand library. Afterwards, to obtain the preferred conformation for each compound, the RDKit program and the UFF force field were used to generate up to 50 three-dimensional (3D) conformers for each compound. The conformer with the minimum energy for each compound was put into the ligand library. Finally, the Endogenous Ligands, ChEMBL Diversity, ZINC Diversity, SPECS Diversity, and NCI Diversity library included 10512, 40398, 48713, 10070, and 20302 compounds, respectively.

### **Ligand library selection for users**

ZINC Diversity library contains 48713 diverse compounds, which was constructed from the “for-sale” subset of ZINC (version 15)<sup>1</sup>. All compounds in the library are for sale, a quarter of which are available for immediate delivery. In addition, the compounds in the library are annotated with chemical properties and available commercial vendors. Thus it is very convenient for users to obtain any compound to perform experimental validation when using ZINC Diversity for allosteric modulator screening.

Endogenous Ligands library has 10512 diverse endogenous metabolites, which was built from the “endogenous” subset of ZINC (version 15)<sup>1</sup>. The library focuses on the curation of primary metabolites observed in humans. Characterizing the potential

allosteric metabolite-protein interactions by screening the library may thus deepen our understanding of the molecular underpinnings for metabolites in feedback modulation of pathways and has profound importance in human health as a consequence of the strong interplay between metabolites and the pathogenesis of various diseases.

ChEMBL Diversity library contains 40398 diverse compounds, which was derived from ChEMBL (version 23)<sup>2</sup>, an open large-scale bioactivity database. Compounds in the library were manually curated from the medicinal chemistry literature. As the result, the biological and pharmaceutical annotations of the compounds are rather rich and full of believable, such as structure-activity relationship, selectivity, and ADMET information. Users may unravel novel allosteric mechanism for these bioactive compounds when using the ChEMBL Diversity library for screening in the AlloFinder server.

SPECS Diversity library has 10070 diverse compounds, which was created from SPECS in-house compound database. SPECS (<http://www.specs.net>) is world's leading provider of compound management services since 1987. Their chemically diverse in-house collection consists of single synthesized, well-characterized and drug-like small molecules. Users can find novel structures using the library during the allosteric modulator screening.

NCI Diversity library contains 20302 diverse compounds from the Open National Cancer Institute (NCI) database<sup>3</sup>. Compounds in the library have been evaluated as potential anticancer and anti-HIV agents. The library is recommended for users to screen allosteric modulators on cancer-related and HIV-related targets.

### **Allosteric site preparation**

Allosteric modulator discovery with the AlloFinder server employs the Allosite algorithm to generate all potential allosteric sites using feature-based regression combined with NMA-based perturbation<sup>4,5</sup>. We built the algorithm in the AlloFinder server and a parameter of ten thousand iterations in pocket detection is used to obtain more accurate pockets throughout a query protein. In addition, other parameters are set by default. Redundant pockets are removed. The scores of both feature-based logistic regression  $P_{feature}$  and NMA-based perturbation  $P_{NMA}$  are calculated on each pocket, and potential allosteric sites are outputted with  $P_{Allosite} > 0.2$  in the server:

$$P_{Allosite} = 0.8 * P_{feature} + 0.2 * P_{NMA}$$

Users submit the structure of proteins either with a PDB ID or by uploading PDB-formatted coordinate file. The size of the input structures should not exceed 2000 amino acids, considering normal mode analysis is time-consuming in large systems. The running time is depended on the size and the complexity of the query protein. Normally, a representative procedure of allosteric site preparation for a 500-residues protein will take 20 seconds. After all the computations are completed, a group of potential allosteric sites are well prepared and shown. Users may select one favorable site to start allosteric modulator discovery in the AlloFinder server.

### **Ligands preparation**

To accelerate the large-scale screening of allosteric modulators at a selected allosteric site, we used a pocket-generated pharmacophore model automatically extracted from the allosteric site as a filter to quickly rule out compounds in a library that have no key pharmacophore groups for binding to the site. The pocket-based pharmacophore algorithm was from LigBuilder software developed by us<sup>6</sup> and transplanted into the AlloFinder server. Compounds in the library filtered through the pharmacophore model (Feature Score of pharmacophore > 0.5) are prepared for allosteric modulator discovery in the AlloFinder server.

### **Allosteric modulator screening of AlloFinder**

An efficient two-step protocol for allosteric modulators screening was designed by the combination of conformational sampling and allosteric scoring procedures in the AlloFinder server. The protocol used the Python programming language (<http://www.python.org>) to bind two separate steps together into an automatic workflow.

*Conformational sampling procedure.* The AutoDock Vina algorithm (v1.1.2) was built in the AlloFinder server to generate an ensemble of diverse sampling conformations for each ligand at a predicted allosteric site of query protein as before<sup>7</sup> and the procedure is briefly described below. Each genetic algorithm (GA) run outputs 10 docked conformations as the result. Since a conformational ensemble is desired, 10 individual GA runs are performed to generate 100 docked conformations for each ligand. The parameters used for each GA are exhaustiveness arg = 7 and energy\_range arg = 3. During sampling, all the rotatable single bonds in the ligand are allowed to rotate except those whose rotations do not result in different conformations, such as the ones connecting a terminal -CH<sub>3</sub> group. Flexibility in cyclic parts of the

ligand is neglected. The size of the docking box is  $30 \text{ \AA} \times 30 \text{ \AA} \times 30 \text{ \AA}$ , which is centered at the predicted allosteric site. Initial conformations of the ligand are generated randomly in the box. Other miscellaneous parameters are assigned the default values given by the AutoDock Vina algorithm. The protein structure is kept fixed during the sampling.

*Allosteric scoring procedure.* The conformational ensemble of each ligand generated from the conformational sampling procedure is directly evaluated for binding affinity of the ligand at the site by the Alloscore algorithm (built in the AlloFinder server), which is specifically designed for accurate allosteric modulator-protein interaction evaluation and outperforms other methods in the prediction of allosteric modulator-protein binding affinities<sup>8</sup>. The binding affinity of a given allosteric modulator-protein complex, as expressed in logarithm units ( $\log K_d$ ), is calculated by summing all of six energy terms, with the following resulting functions:

$$pK_d = c_0 + c_1 M_{VDW} + c_2 M_{H-bond} + c_3 M_{RT} + c_4 M_{hydrophobic} + c_5 M_{\Delta VOL} + c_6 M_{\Delta PSAS}$$

where  $M_{VDW}$ ,  $M_{H-bond}$ ,  $M_{RT}$ ,  $M_{hydrophobic}$ ,  $M_{\Delta VOL}$ , and  $M_{\Delta PSAS}$  represent the binding energy terms from VDW interaction, hydrogen bond, rotatable bond, hydrophobic interaction, buried molecular volume, and buried polar surface area, respectively. The weight parameters of the Alloscore for  $M_{VDW}$ ,  $M_{H-bond}$ ,  $M_{RT}$ ,  $M_{hydrophobic}$ ,  $M_{\Delta VOL}$ , and  $M_{\Delta PSAS}$  used in the AlloFinder platform are set by default. A conformation with the best binding affinity score (or the lowest binding affinity) from the ensemble is chosen as the final “Alloscore Score” for each ligand. All ligands of a library in screening are ranked by the score in descending order and the top 100 docked ligands are outputted in the AlloFinder server.

### **Allosterome mapping of AlloFinder**

Allosterome analysis contains two items, mapping of the predicted allosteric sites and modulators to the known allosteric sites and modulators, respectively.

*Allosteric site mapping.* The 3D structure of each predicted allosteric site is aligned to 636 known human allosteric sites by using the APOC algorithm<sup>9</sup>. The parameter “-fa” is set to 0 to perform the alignment of pocket structure only, and the normalized Pocket Similarity score (PS-score) between the predicted allosteric site and each known allosteric site is calculated for ranking. The 20 known allosteric sites that are

most similar with the predicted allosteric site are outputted. Besides, a structural homologous analysis of the predicted allosteric site with human known allosteric sites is performed to reveal evolutionary neighbors. The standard APE algorithm<sup>10</sup> in the AlloFinder server is used for generating phylogenetic tree.

*Allosteric modulator mapping.* The 2D structure of each predicted allosteric modulator is searched with the 263 endogenous and 70390 exogenous allosteric modulator libraries, respectively, using the MACCS Fingerprint of Open label Fastsearch algorithm<sup>11</sup>. For similarity searching, 50 allosteric modulators in each library that are most similar to the predicted allosteric modulator are produced. The physicochemical properties of modulators such as TPSA, logP, and MW are calculated by the Pybel method<sup>12</sup>. In addition, the server also aligns the 2D structure of each predicted allosteric modulator with the 17323 allosteric metabolites engaged in pathways/networks annotated in AlloFinder and KEGG database<sup>13</sup> by using the same searching method. The pathways and networks of the predicted allosteric metabolite or its most similar metabolite are provided, revealing the potential metabolic mechanism engaged in by the modulator.

### **Protein expression and purification**

*E. coli* cells were grown at 37°C and induced at 25°C with 0.5 mM IPTG. Ni Sepharose 6 Fast Flow (Qiagen) was used to purify STAT3. Lysis buffer: 20 mM Tris, 0.3 M NaCl, 10% glycerol, 20 mM imidazole, β-ME, pH 8.0. Wash buffer: 20 mM Tris, 0.1 M NaCl, 50 mM imidazole, β-ME, pH 8.0. Elution buffer: 20 mM Tris, 0.1 M NaCl, 400 mM imidazole, β-ME, pH 8.0. Gel filtration chromatography was used to purify STAT3 by AKTA explorer. We used PD-10 columns (GE Healthcare) to change the protein buffer to 20 mM HEPES, 0.1 M NaCl, pH 7.5. STAT3 CCD is the construction of STAT3 amino acid from 127 to 320. Mutants of STAT3 CCD (N175G/K177G, Q212A/M213G) and mutants of STAT3 (R595G, K591A/S611G, I634S/Q635G, K591A) are used the same purify assay.

### **Fluorescence polarization assay**

The detailed fluorescence polarization assay was described previously<sup>14</sup>. We used the fluorescent probe peptide Ac-pYLPQTV-NH<sub>2</sub> (protected from light) as a negative control and the non-phosphorylated Ac-pYLPQTV-NH<sub>2</sub> peptide as a positive control.

The small compounds were purchased from SPECS library. Varying concentrations of small molecular compounds were prepared in black 96-well round-bottom plates (Corning 3560), and STAT3 protein (0.5  $\mu\text{M}$ ) was incubated with these compounds for 1.5 h on a shaker. Next, the fluorescent tracer was added to the sample wells at 1 nM. The assay buffer contained 10 mM HEPES, 50 mM NaCl, 1 mM EDTA, 0.1% NP-40, and 2 mM DTT. An additional 1.5 h was used for smaller compounds and probes to combine with STAT3 protein. The fluorescence polarization value was measured on a BioTek Plate reader with excitation at 485 nm and emission at 520 nm. Data were processed using GraphPad Prism 5.

### **Surface plasmon resonance (SPR)**

SPR experiments were performed at 25 °C using a Biacore T200 instrument. First, the baseline RU of the chip, when bathed in PBS buffer, was determined. Second, K116 were injected into the flow cell and flowed for 90 s. The association phase showed increasing resonance units (RUs) during the flow of K116. Finally, the flow of K116 was terminated, and PBS buffer flow was initiated for 90 s. The concentration of K116 was tested in twofold dilutions from 25 $\mu\text{M}$  to 0.39 $\mu\text{M}$ . This is known as the dissociation phase. Subsequently, we obtained the exact binding affinity of K116 with STAT3 CCD and mutants. The kinetic parameter  $K_d$  for each interaction was determined by globally fitting the experimental data with the Biacore T200 Evaluation Software 4.1 (GE Healthcare).

### **Cell growth assay**

MDA-MB-468 and DU145 cells were plated at equal confluence in 96-well plates and were left either untreated or treated of K116 with concentrations ranging from 1 mM to 0.18 mM continually during the indicated time for 24 h. Cells from individual wells were supplied with 10  $\mu\text{l}$  of CCK8 for 4 h at 37°C. Absorption was measured on a BioTek Plate reader at 450 nm. Data were processed using GraphPad Prism 5. Graphs represent the total cell numbers at each time interval, and the error bars represent the s.e.m. Half-maximal inhibitory concentrations ( $\text{IC}_{50}$ ) were calculated using GraphPad Prism 5.

### **Cell apoptosis assay**

MDA-MB-468 cells were seeded in 6-well plates at a density of  $5 \times 10^5$  cells per well and grown with L15 at 37 °C in a humidified incubator without 5%  $\text{CO}_2$ . Cells were

treated with K116 (1  $\mu$ M, 10  $\mu$ M, 20  $\mu$ M, 30  $\mu$ M, and 50  $\mu$ M) or 0.1% DMSO for 24 h. Cell morphology was visualized using light microscopy.

### **Immunoblotting assay**

Protein samples were separated using SDS-PAGE and transferred onto a NC membrane. After blockade with 5% nonfat milk, the proteins were analyzed by standard procedures using antibodies to STAT3 (Cell Signaling Technology), phospho-STAT3 (pY705STAT3, Cell Signaling Technology), Src (Cell Signaling Technology), phospho-Src (p-Src, Cell Signaling Technology), Cyclin D1, the anti-apoptotic gene Bcl-xL, and C-Myc. Alternatively, secondary antibodies of peroxidase-labeled mouse-specific or rabbit HRP-specific antibodies were detected.



## Figures

**A Job Submit**

Job Name: ALLOFINDER\_EXAMPLE1 [Example 1](#) [Example 2](#)

Query Protein:  PDB ID: 3UVV  PDB File: [Upload File](#)

Ligand Library: Endogenous Ligands [Run](#) [Reset](#)

**News**

2017.10 **AlloFinder V1.01 is released.**

2017.6 **Allosterome mapping is optimized.**

2016.12 **Endogenous ligand & NCI library are added.**

2016.5 **AlloFinder V1.00 is released.**

**B > Job Progress**

[2018-04-14 12:36:46] Job: 2018041412343030\_871 Started. Begin allosteric site hunting.  
[2018-04-14 12:37:05] (1/5): Allosteric site identification finished.  
**Please select site....**

20% [Next Step](#) [Bookmark the Result](#)

**> Job Result**

**Site 1**  
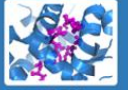  
Score: 0.729

**C > Job Result**

[Download predicted allosteric site\(s\)](#) [Download predicted allo-ligand\(s\)](#) [Download allosterome](#)

 JSmol

|                              |                                                                   |
|------------------------------|-------------------------------------------------------------------|
| <b>Protein Name</b>          | Thyroid hormone receptor alpha   Retinoic acid receptor RXR-alpha |
| <b>PDB ID</b>                | 3UVV (UniProt ID: P04625)                                         |
| <b>Allosteric Site Score</b> | 0.729                                                             |
| <b>Drug-like Score</b>       | 0.647                                                             |
| <b>Perturbation Score</b>    | 0.334                                                             |
| <b>Volume(A<sup>3</sup>)</b> | 1006.578                                                          |

[Site Allosterome Mapping](#) **Site analyses based on known allosteric sites**

| Rank | Structure                                                                           | MW    | AlloScore | Display                     | Ligand Allosterome Mapping                                                                                                                                                  |
|------|-------------------------------------------------------------------------------------|-------|-----------|-----------------------------|-----------------------------------------------------------------------------------------------------------------------------------------------------------------------------|
| 1    |  | 316.2 | 7.12      | <a href="#">Show Ligand</a> | <a href="#">Endogenous</a> <a href="#">Exogenous</a><br><b>Ligand analyses based on known allosteric modulators</b><br><a href="#">Endogenous</a> <a href="#">Exogenous</a> |
| 2    |  | 302.2 | 7.04      | <a href="#">Show Ligand</a> | <a href="#">Endogenous</a> <a href="#">Exogenous</a>                                                                                                                        |
| 3    |  | 316.2 | 7         | <a href="#">Show Ligand</a> | <a href="#">Endogenous</a> <a href="#">Exogenous</a>                                                                                                                        |

**Figure S1.** Screenshots of the procedure from Example 1 application of the AlloFinder webserver to the discovery of potential allosteric metabolites of TR:RXR

heterodimers (PDB ID: 3UVV)<sup>15</sup>. (A) Input parameters for the screening. (B) Selection of predicted allosteric site “Site 1” for the screening. (C) Job result of the screening as output.

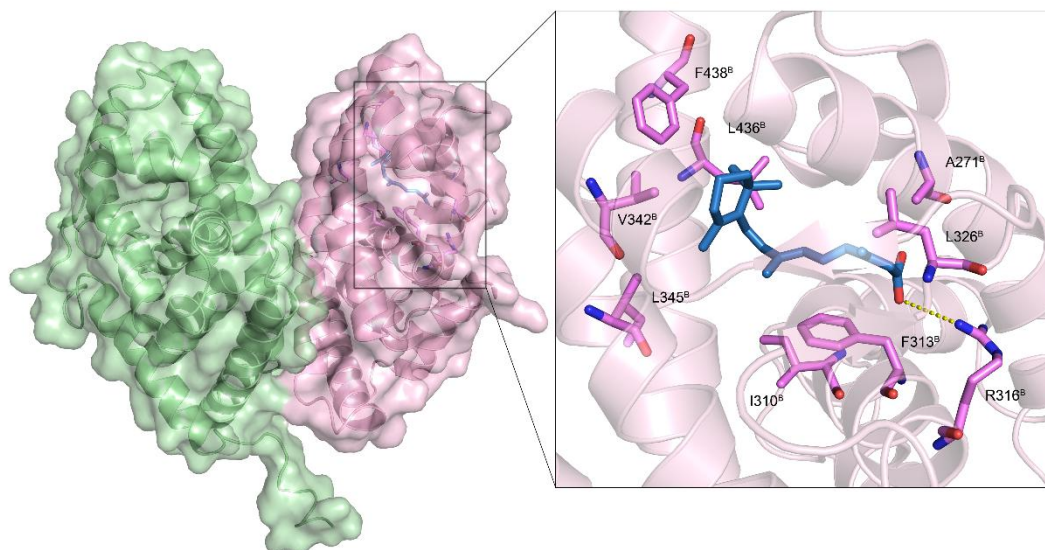

**Figure S2.** The binding result of 9-cis retinoic acid at the predicted allosteric site in Example 1. Left: The TR (palegreen): RXR (lightpink) heterodimer is represented as surface and cartoon, with the docked 9-cis retinoic acid and site residues shown as stick. Right: The zoom-in version of the binding site of 9-cis retinoic acid. As shown at the site, the 2,6,6-trimethylcyclohexen group of 9-cis retinoic acid is embedded into a hydrophobic subpocket formed by F438<sup>B</sup>, V342<sup>B</sup>, L345<sup>B</sup>, L436<sup>B</sup>, and the 3,7-dimethyl group makes hydrophobic contacts with residues A271<sup>B</sup>, L326<sup>B</sup>, I310<sup>B</sup> and F313<sup>B</sup>. More importantly, the terminal carboxyl group forms a salt bridge with the side chain of R316<sup>B</sup>. All of the atomic interactions together contribute to the high-ranked binding affinity of 9-cis retinoic acid at the predicted allosteric site of TR:RXR.

**A Job Submit**

Job Name: ALLOFINDER\_EXAMPLE2 [Example 1](#) [Example 2](#)

Query Protein:  PDB ID: 3QEL  PDB File: [Upload File](#)

Ligand Library: ZINC Diversity

[Run](#) [Reset](#)

**News**

2017.10  
AlloFinder V1.01 is released.

2017.6  
Allosterome mapping is optimized.

2016.12  
Endogenous ligand & NCI library are added.

2016.5  
AlloFinder V1.00 is released.

**B > Job Progress**

[2018-04-14 13:00:49] Job: 2018041412582929\_777 Started. Begin allosteric site hunting.  
[2018-04-14 13:01:08] (1/5): Allosteric site identification finished.

20%

[Next Step](#) [Bookmark the Result](#)

**> Job Result**

Site 1:  Score: 0.647

Site 2:  Score: 0.520

**C > Job Result**

[Download predicted allosteric site\(s\)](#) [Download predicted allo-ligand\(s\)](#) [Download allosterome](#)

 JSmol

|                         |                                                                                                                      |
|-------------------------|----------------------------------------------------------------------------------------------------------------------|
| Protein Name            | CRYSTAL STRUCTURE OF AMINO TERMINAL DOMAINS OF THE NMDA RECEPTOR SUBUNIT GLUN1 AND GLUN2B IN COMPLEX WITH IFENPRODIL |
| PDB ID                  | 3QEL (UniProt ID: Q91977)                                                                                            |
| Allosteric Site Score   | 0.647                                                                                                                |
| Drug-like Score         | 0.513                                                                                                                |
| Perturbation Score      | 0.092                                                                                                                |
| Volume(Å <sup>3</sup> ) | 1192.993                                                                                                             |

[Site Allosterome Mapping](#) **Site analyses based on known allosteric sites**

| Rank | Structure                                                                           | MW    | AlloScore | Display                     | Ligand Allosterome Mapping                                                                                          |
|------|-------------------------------------------------------------------------------------|-------|-----------|-----------------------------|---------------------------------------------------------------------------------------------------------------------|
| 1    |  | 413.3 | 7.63      | <a href="#">Show Ligand</a> | <a href="#">Endogenous</a> <a href="#">Exogenous</a><br><b>Ligand analyses based on known allosteric modulators</b> |
| 2    |  | 387.3 | 7.37      | <a href="#">Show Ligand</a> | <a href="#">Endogenous</a> <a href="#">Exogenous</a>                                                                |

**Figure S3.** Screenshots of the procedure from Example 2 application of the AlloFinder webserver to the discovery of potential allosteric modulators of GluN1b:GluN2B NMDA receptors (PDB ID: 3QEL)<sup>16</sup>. (A) Input parameters for the screening. (B) Selection of predicted allosteric site “Site 1” for the screening. (C) Job

result of the screening as output.

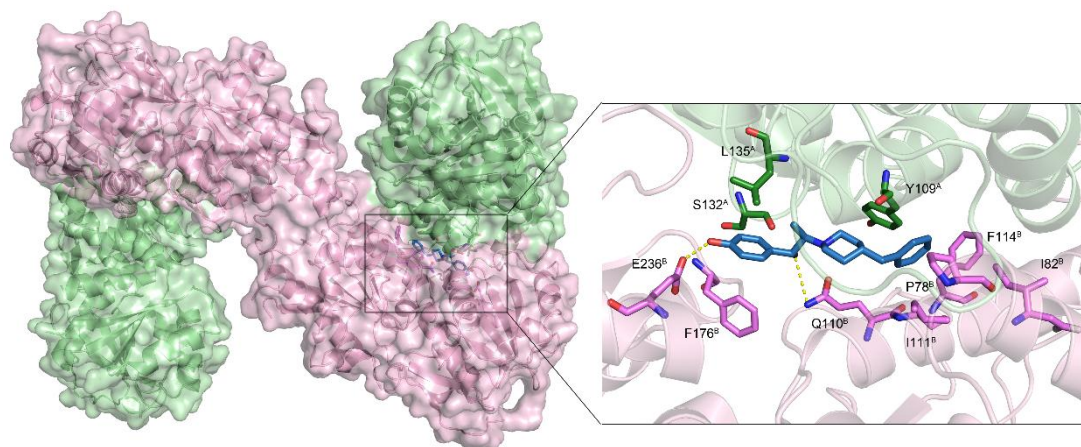

**Figure S4.** The binding result of ifenprodil at the predicted allosteric site in Example 2. Left: The GluN1b (palegreen): GluN2B (lightpink) NMDA receptor is represented as surface and cartoon, with the docked ifenprodil and pocket residues shown as stick. Right: The zoom-in version of the binding site of ifenprodil. According to the result of AlloFinder, two hydrogen bonds are formed between ifenprodil and the side chains of E236<sup>B</sup> and Q110<sup>B</sup>. In addition, the benzyl group of ifenprodil forms hydrophobic interactions with L135<sup>A</sup> and F176<sup>B</sup>, and the terminal benzene group creates hydrophobic interactions with Y109<sup>A</sup>, F114<sup>B</sup>, I82<sup>B</sup>, I111<sup>B</sup> and P78<sup>B</sup>. The rich interactions between ifenprodil and GluN1b: GluN2B explain the better binding affinity at the top 2 of ranked benchmark dataset.

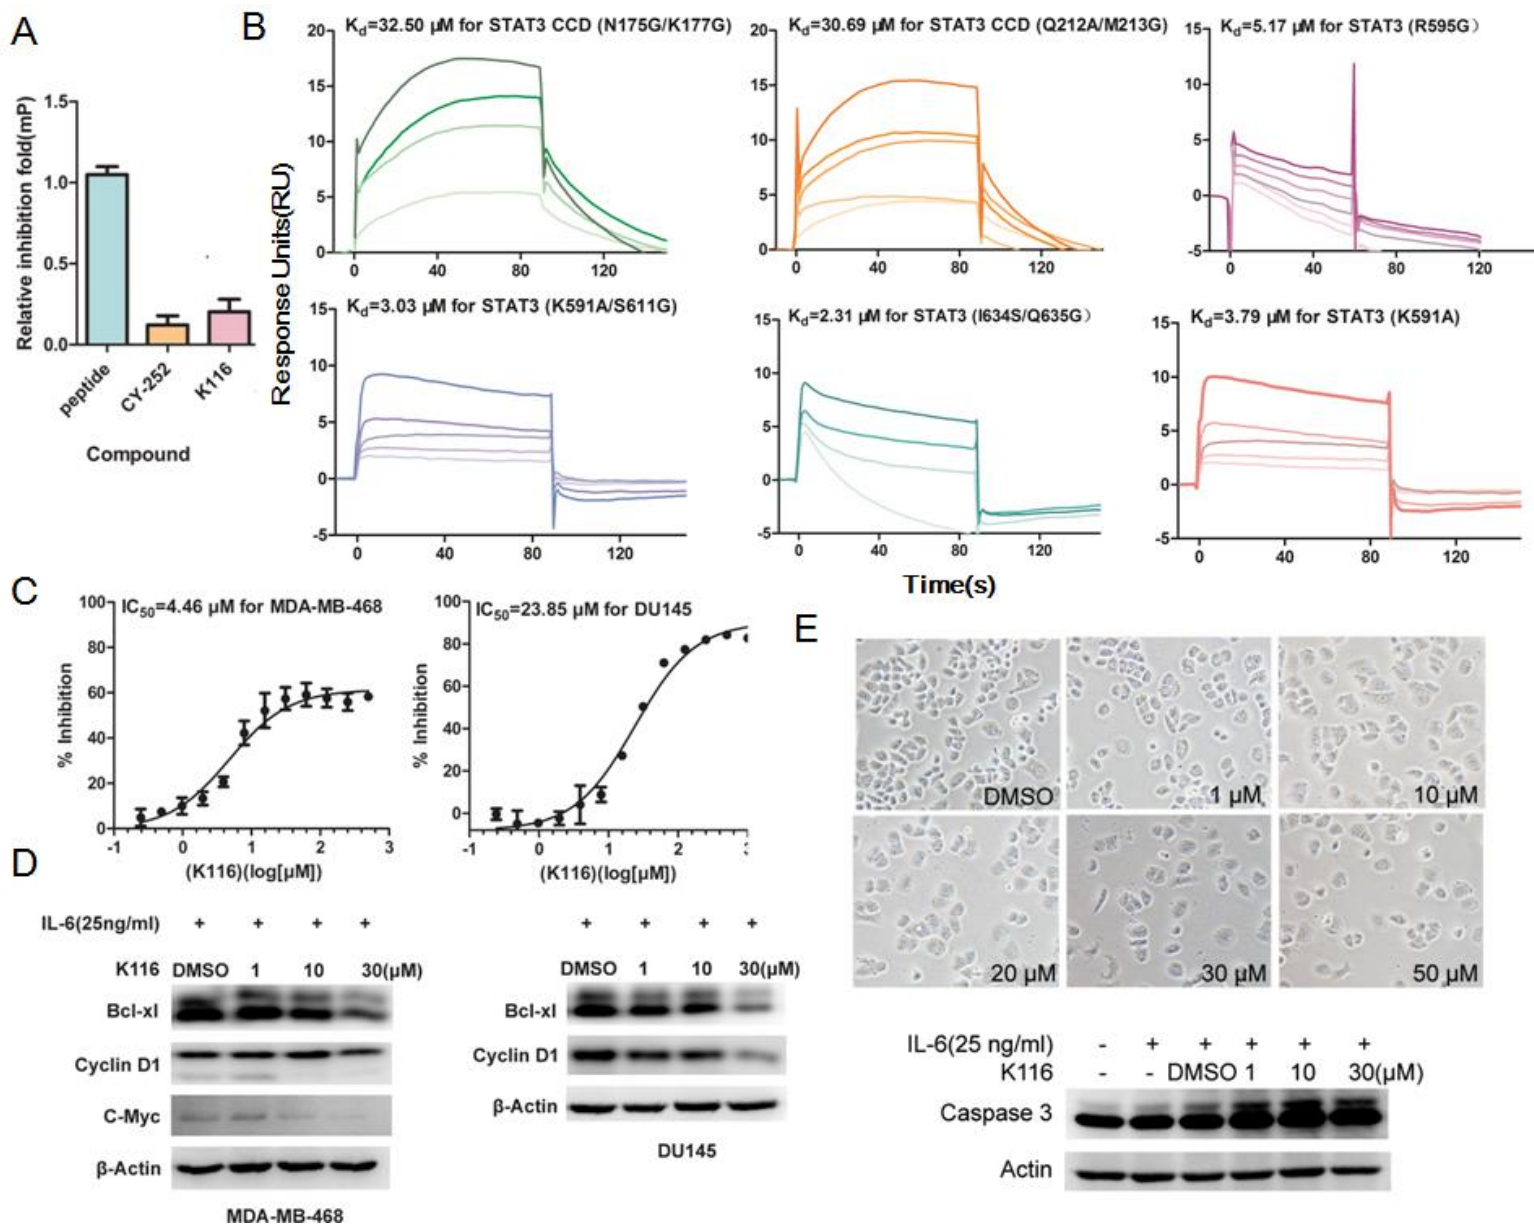

**Figure S5.** Biological evaluation of K116 against STAT3. (A) Identification of the inhibition of K116 by FP. Ac-pYLPQTV-NH<sub>2</sub> as a negative control (peptide). Positive control (CY-252) is non-phosphorylated Ac-YLPQTV-NH<sub>2</sub> peptide. (B) The binding affinity of K116 with mutants (N175G/K177G, Q212A/M213G, R595G, K591A/S611G, I634S/Q635G, K591A) of STAT3 by SPR. (C) K116 inhibits the growth of MDA-MB-468 and DU145 cells. (D) Down-regulation of STAT3 target genes (CyclinD1, Bcl-xL, and C-Myc) in MDA-MB-468 and DU145 cells treated with K116 for 24 h. (E) K116 induced MDA-MB-468 cell apoptosis. Cell morphology features were visualized using light microscopy, and increasing Caspase-3 levels were detected after treatment with DMSO or 1  $\mu\text{M}$ , 10  $\mu\text{M}$ , 20  $\mu\text{M}$ , 30  $\mu\text{M}$  K116 for 24 h. Quantitative analysis of cells from three independent experiments was performed.

## Tables

**Table S1.** Enrichment factors (EFs) of known allosteric modulators for 60 proteins in the benchmark by AlloFinder.

| Protein class  | Protein(site) <sup>a</sup> | PDB ID | Resolution (Å) | Number of actives | EF1 <sup>b</sup> | EF5  | EF20 |
|----------------|----------------------------|--------|----------------|-------------------|------------------|------|------|
| Kinase         | ABL1                       | 3PYY   | 1.9            | 34                | 20.6             | 8.2  | 3.1  |
|                | AKT1                       | 3O96   | 2.7            | 34                | 29.4             | 17.1 | 4.7  |
|                | Chk1                       | 3F9N   | 1.9            | 35                | 28.6             | 18.9 | 4.9  |
|                | CDK2                       | 3PXF   | 1.8            | 32                | 28.1             | 15.0 | 4.7  |
|                | FAK                        | 4EBW   | 2.7            | 5                 | 100.0            | 20.0 | 5.0  |
|                | GK                         | 3H1V   | 2.1            | 26                | 30.8             | 10.0 | 3.3  |
|                | IGF-1R                     | 3LW0   | 1.8            | 18                | 38.9             | 15.6 | 4.4  |
|                | JAK2                       | 5UT6   | 1.7            | 1                 | 0.0              | 20.0 | 5.0  |
|                | LIMK2                      | 4TPT   | 2.6            | 34                | 29.4             | 19.4 | 5.0  |
|                | MAPK7                      | 4ZSJ   | 2.5            | 1                 | 100.0            | 20.0 | 5.0  |
|                | MAPK8                      | 3O2M   | 2.7            | 41                | 22.0             | 9.8  | 3.8  |
|                | PAK1                       | 4ZLO   | 2.5            | 3                 | 66.7             | 20.0 | 5.0  |
|                | WNK1                       | 5WDY   | 2.5            | 3                 | 66.7             | 13.3 | 5.0  |
| Protease       | CASP6                      | 4NBN   | 1.8            | 6                 | 33.3             | 10.0 | 3.3  |
|                | ClpP                       | 5DL1   | 3.0            | 1                 | 0.0              | 20.0 | 5.0  |
|                | CTSK                       | 4LEG   | 2.2            | 1                 | 0.0              | 0.0  | 5.0  |
|                | IN                         | 4NYF   | 1.9            | 48                | 18.8             | 8.8  | 3.6  |
|                | KSHV_Pr                    | 3NJQ   | 2.0            | 1                 | 100.0            | 20.0 | 5.0  |
|                | MALT1                      | 4I1R   | 2.7            | 1                 | 0.0              | 20.0 | 5.0  |
| Transferase    | Bcy1                       | 3OF1   | 2.2            | 30                | 33.3             | 15.3 | 4.0  |
|                | DAHPS                      | 1KFL   | 2.8            | 4                 | 0.0              | 10.0 | 2.5  |
|                | Ep                         | 1MP3   | 2.2            | 21                | 23.8             | 8.6  | 3.6  |
|                | FPPS                       | 3N1V   | 2.2            | 50                | 20.0             | 12.4 | 3.5  |
|                | GP                         | 3CEH   | 2.8            | 1                 | 100.0            | 20.0 | 5.0  |
|                | UAP                        | 4BQH   | 1.8            | 10                | 60.0             | 16.0 | 4.0  |
|                | UPPs                       | 4Q9M   | 2.1            | 1                 | 100.0            | 20.0 | 5.0  |
| Hydrolase      | BRR2                       | 5URK   | 3.0            | 1                 | 100.0            | 20.0 | 5.0  |
|                | FBP1                       | 2JJK   | 2.0            | 18                | 33.3             | 8.9  | 3.6  |
|                | FBP2                       | 3IFA   | 1.9            | 16                | 12.5             | 8.8  | 4.1  |
|                | GLS                        | 3UO9   | 2.3            | 39                | 17.9             | 8.7  | 3.8  |
|                | SHP2                       | 5EHP   | 1.9            | 2                 | 100.0            | 20.0 | 5.0  |
|                | Sirt1                      | 5BTR   | 3.2            | 1                 | 100.0            | 20.0 | 5.0  |
|                | Sirt3                      | 4C7B   | 2.1            | 5                 | 40.0             | 16.0 | 4.0  |
| Oxidoreductase | IDH1                       | 5DE1   | 2.3            | 1                 | 100.0            | 20.0 | 5.0  |
|                | IDH2                       | 4JA8   | 1.6            | 11                | 63.6             | 18.2 | 4.5  |
|                | NAD-IDH                    | 5GRE   | 2.7            | 1                 | 100.0            | 20.0 | 5.0  |
|                | RNR                        | 1XJF   | 2.4            | 7                 | 0.0              | 5.7  | 2.9  |

|                      |                |      |     |    |       |      |     |
|----------------------|----------------|------|-----|----|-------|------|-----|
| Isomerase            | MurI(site 1)   | 2W4I | 1.9 | 1  | 100.0 | 20.0 | 5.0 |
|                      | MurI(site 2)   | 4B1F | 2.1 | 1  | 100.0 | 20.0 | 5.0 |
|                      | Ugd            | 3PJG | 2.7 | 3  | 33.3  | 20.0 | 5.0 |
| GPCR                 | $\beta$ 2AR    | 5X7D | 2.7 | 1  | 100.0 | 20.0 | 5.0 |
|                      | CCR5           | 4MBS | 2.7 | 24 | 41.7  | 18.3 | 5.0 |
|                      | mGlu5          | 4OO9 | 2.6 | 1  | 0.0   | 20.0 | 5.0 |
| Ligase               | ACC            | 1W96 | 1.8 | 32 | 25.0  | 8.1  | 2.7 |
|                      | ProRS          | 4W11 | 1.7 | 27 | 25.9  | 14.1 | 4.8 |
| Nuclear receptor     | ROR $\gamma$ t | 5C4T | 1.8 | 4  | 100.0 | 20.0 | 5.0 |
|                      | TR             | 3UVV | 3.0 | 1  | 100.0 | 20.0 | 5.0 |
| Channel              | nAChR          | 5AFJ | 2.2 | 1  | 100.0 | 20.0 | 5.0 |
|                      | GluN2B         | 3QEL | 2.6 | 18 | 16.7  | 10.0 | 3.9 |
| Cell cycle           | Cdc4           | 3MKS | 2.6 | 1  | 100.0 | 20.0 | 5.0 |
|                      | KSP            | 4BBG | 2.8 | 1  | 100.0 | 20.0 | 5.0 |
| Transport            | HAS            | 3LU6 | 2.7 | 1  | 100.0 | 20.0 | 5.0 |
|                      | HBA            | 2D60 | 1.7 | 1  | 100.0 | 20.0 | 5.0 |
| Motor protein        | Myo(site 1)    | 2JHR | 2.8 | 1  | 100.0 | 20.0 | 5.0 |
|                      | Myo(site 2)    | 3BZ7 | 2.0 | 1  | 100.0 | 20.0 | 5.0 |
| Transcription Factor | TetR           | 2VPR | 2.5 | 1  | 100.0 | 20.0 | 5.0 |
| Lyase                | AC             | 4OYA | 2.0 | 9  | 22.2  | 8.9  | 3.9 |
| Cell adhesion        | LFA-1          | 3M6F | 1.9 | 28 | 35.7  | 20.0 | 5.0 |
| Other Proteins       | NS5B           | 4NLD | 2.8 | 3  | 66.7  | 20.0 | 5.0 |
|                      | TcdA           | 3HO6 | 1.6 | 2  | 50.0  | 20.0 | 5.0 |

<sup>a</sup>Abbreviations: ABL1, Tyrosine-protein kinase ABL1; AKT1, RAC-alpha serine/threonine-protein kinase; Chk1, Serine/threonine-protein kinase Chk1; CDK2, Cyclin-dependent kinase 2; FAK, Focal adhesion kinase 1; GK, Glucokinase; IGF-1R, Insulin-like growth factor 1 receptor; JAK2, Tyrosine-protein kinase JAK2; LIMK2, LIM domain kinase 2; MAPK7, Mitogen-activated protein kinase 7; MAPK8, Mitogen-activated protein kinase 8; PAK1, Serine/threonine-protein kinase PAK 1; WNK1, Serine/threonine-protein kinase WNK1; CASP6, Caspase-6; ClpP, ATP-dependent Clp protease proteolytic subunit; CTSK, Cathepsin K; IN, HIV-1 integrase; KSHV\_Pr, Capsid scaffolding protein; MALT1, Mucosa-associated lymphoid tissue lymphoma translocation protein 1; Bcl1, cAMP-dependent protein kinase regulatory subunit; DAHPS, Phospho-2-dehydro-3-deoxyheptonate aldolase, Phe-sensitive; Ep, Glucose-1-phosphate thymidyltransferase; FPPS, Farnesyl pyrophosphate synthase; GP, Glycogen phosphorylase, liver form; UAP, UDP-N-acetylglucosamine pyrophosphorylase; UPPs, Isoprenyl transferase; BRR2, U5 small nuclear ribonucleoprotein 200 kDa helicase; FBP1, Fructose-1,6-bisphosphatase 1; FBP2, Fructose-1,6-bisphosphatase isozyme 2; GLS, Glutaminase kidney isoform, mitochondrial; SHP2, Tyrosine-protein phosphatase non-receptor type 11; Sirt1, NAD-dependent protein deacetylase sirtuin-1; Sirt3, NAD-dependent protein deacetylase sirtuin-3, mitochondrial; IDH1, Isocitrate dehydrogenase [NADP] cytoplasmic; IDH2, Isocitrate dehydrogenase [NADP], mitochondrial; NAD-IDH, Isocitrate dehydrogenase [NAD] subunit alpha, mitochondrial; RNR, Ribonucleotide reductase; MurI, Glutamate racemase; Ugd, UDP-glucose 6-dehydrogenase; ACC, Acetyl-CoA carboxylase; ProRS, Proline-tRNA ligase; AC, Adenylate cyclase type 10;  $\beta$ 2AR, Beta-2 adrenergic receptor; CCR5, C-C chemokine receptor type 5; mGlu5, Metabotropic glutamate receptor; ROR $\gamma$ t, Nuclear receptor ROR-gamma; TR, Thyroid hormone receptor alpha; GluN2B, Glutamate receptor ionotropic, NMDA 2B; nAChR, Neuronal acetylcholine receptor subunit alpha-7; Cdc4, Cell division control protein 4; KSP, Kinesin-like protein KIF11; HAS, Serum albumin; HBA, Hemoglobin subunit beta; Myo, Myosin-2 heavy chain; TetR, Tetracycline repressor protein class H; LFA-1, Integrin alpha-L; NS5B, HCV NS5B polymerase; TcdA, Toxin A.

<sup>b</sup>EF(n) is the concentration of the known ligands among n% top-scoring hits compared to their concentration throughout the entire library.

**Supplementary Table S2:** Hit Rate (HR) of known allosteric modulators for 60 proteins in the benchmark by AlloFinder.<sup>a</sup>

| Protein class    | Protein(site) | PDB ID | Resolution (Å) | Number of actives | HR <sup>b</sup> |
|------------------|---------------|--------|----------------|-------------------|-----------------|
| Kinase           | ABL1          | 3PYY   | 1.9            | 34                | 0.62            |
|                  | AKT1          | 3O96   | 2.7            | 34                | 0.94            |
|                  | Chk1          | 3F9N   | 1.9            | 35                | 0.97            |
|                  | CDK2          | 3PXF   | 1.8            | 32                | 0.94            |
|                  | FAK           | 4EBW   | 2.7            | 5                 | 1.00            |
|                  | GK            | 3H1V   | 2.1            | 26                | 0.65            |
|                  | IGF-1R        | 3LW0   | 1.8            | 18                | 0.89            |
|                  | JAK2          | 5UT6   | 1.7            | 1                 | 1.00            |
|                  | LIMK2         | 4TPT   | 2.6            | 34                | 1.00            |
|                  | MAPK7         | 4ZSJ   | 2.5            | 1                 | 1.00            |
|                  | MAPK8         | 3O2M   | 2.7            | 41                | 0.76            |
|                  | PAK1          | 4ZLO   | 2.5            | 3                 | 1.00            |
|                  | WNK1          | 5WDY   | 2.5            | 3                 | 1.00            |
| Protease         | CASP6         | 4NBN   | 1.8            | 6                 | 0.67            |
|                  | ClpP          | 5DL1   | 3.0            | 1                 | 1.00            |
|                  | CTSK          | 4LEG   | 2.2            | 1                 | 1.00            |
|                  | IN            | 4NYF   | 1.9            | 48                | 0.73            |
|                  | KSHV_Pr       | 3NJQ   | 2.0            | 1                 | 1.00            |
|                  | MALT1         | 4IIR   | 2.7            | 1                 | 1.00            |
| Transferase      | Bcy1          | 3OF1   | 2.2            | 30                | 0.80            |
|                  | DAHPS         | 1KFL   | 2.8            | 4                 | 0.50            |
|                  | Ep            | 1MP3   | 2.2            | 21                | 0.71            |
|                  | FPPS          | 3N1V   | 2.2            | 50                | 0.70            |
|                  | GP            | 3CEH   | 2.8            | 1                 | 1.00            |
|                  | UAP           | 4BQH   | 1.8            | 10                | 0.80            |
|                  | UPPs          | 4Q9M   | 2.1            | 1                 | 1.00            |
| Hydrolase        | BRR2          | 5URK   | 3.0            | 1                 | 1.00            |
|                  | FBP1          | 2JJK   | 2.0            | 18                | 0.72            |
|                  | FBP2          | 3IFA   | 1.9            | 16                | 0.81            |
|                  | GLS           | 3UO9   | 2.3            | 39                | 0.77            |
|                  | SHP2          | 5EHP   | 1.9            | 2                 | 1.00            |
|                  | Sirt1         | 5BTR   | 3.2            | 1                 | 1.00            |
|                  | Sirt3         | 4C7B   | 2.1            | 5                 | 0.80            |
| Oxidoreductase   | IDH1          | 5DE1   | 2.3            | 1                 | 1.00            |
|                  | IDH2          | 4JA8   | 1.6            | 11                | 0.91            |
|                  | NAD-IDH       | 5GRE   | 2.7            | 1                 | 1.00            |
|                  | RNR           | 1XJF   | 2.4            | 7                 | 0.57            |
| Isomerase        | MurI(site 1)  | 2W4I   | 1.9            | 1                 | 1.00            |
|                  | MurI(site 2)  | 4B1F   | 2.1            | 1                 | 1.00            |
|                  | Ugd           | 3PJG   | 2.7            | 3                 | 1.00            |
| GPCR             | β2AR          | 5X7D   | 2.7            | 1                 | 1.00            |
|                  | CCR5          | 4MBS   | 2.7            | 24                | 1.00            |
|                  | mGlu5         | 4O09   | 2.6            | 1                 | 1.00            |
| Ligase           | ACC           | 1W96   | 1.8            | 32                | 0.53            |
|                  | ProRS         | 4WI1   | 1.7            | 27                | 0.96            |
| Nuclear receptor | RORγt         | 5C4T   | 1.8            | 4                 | 1.00            |
|                  | TR            | 3UVV   | 3.0            | 1                 | 1.00            |
| Channel          | nAChR         | 5AFJ   | 2.2            | 1                 | 1.00            |
|                  | GluN2B        | 3QEL   | 2.6            | 18                | 0.78            |
| Cell cycle       | Cdc4          | 3MKS   | 2.6            | 1                 | 1.00            |
|                  | KSP           | 4BBG   | 2.8            | 1                 | 1.00            |



|                      |             |      |     |    |      |
|----------------------|-------------|------|-----|----|------|
| Transport            | HAS         | 3LU6 | 2.7 | 1  | 1.00 |
|                      | HBA         | 2D60 | 1.7 | 1  | 1.00 |
| Motor protein        | Myo(site 1) | 2JHR | 2.8 | 1  | 1.00 |
|                      | Myo(site 2) | 3BZ7 | 2.0 | 1  | 1.00 |
| Transcription Factor | TetR        | 2VPR | 2.5 | 1  | 1.00 |
| Lyase                | AC          | 4OYA | 2.0 | 9  | 0.78 |
| Cell adhesion        | LFA-1       | 3M6F | 1.9 | 28 | 1.00 |
| Other Proteins       | NS5B        | 4NLD | 2.8 | 3  | 1.00 |
|                      | TcdA        | 3HO6 | 1.6 | 2  | 1.00 |

<sup>a</sup>Abbreviations of proteins are the same as those in Table S1.

<sup>b</sup>HR value represents the ratio of the EF20 (in Table S1) to ideal EF20 (here it is the number of known allosteric modulators) of the ranked benchmark dataset as described before<sup>17</sup>.

**Supplementary Table S3.** Area Under Curve (AUC) values on proteins with  $\geq 10$  known allosteric modulators in the benchmark by AlloFinder.<sup>a</sup>

| Protein class  | Protein | PDB ID | Resolution (Å) | Number of actives | AUC values <sup>b</sup> |
|----------------|---------|--------|----------------|-------------------|-------------------------|
| Kinase         | ABL1    | 3PYY   | 1.9            | 34                | 0.839                   |
|                | AKT1    | 3O96   | 2.7            | 34                | 0.979                   |
|                | Chk1    | 3F9N   | 1.9            | 35                | 0.987                   |
|                | CDK2    | 3PXF   | 1.8            | 32                | 0.958                   |
|                | GK      | 3H1V   | 2.1            | 26                | 0.773                   |
|                | IGF-1R  | 3LW0   | 1.8            | 18                | 0.946                   |
|                | LIMK2   | 4TPT   | 2.6            | 34                | 0.999                   |
|                | MAPK8   | 3O2M   | 2.7            | 41                | 0.853                   |
| Protease       | IN      | 4NYF   | 1.9            | 48                | 0.847                   |
| Transferase    | Bcy1    | 3OF1   | 2.2            | 30                | 0.910                   |
|                | Ep      | 1MP3   | 2.2            | 21                | 0.866                   |
|                | FPPS    | 3N1V   | 2.2            | 50                | 0.869                   |
|                | UAP     | 4BQH   | 1.8            | 10                | 0.949                   |
| Hydrolase      | FBP1    | 2JJK   | 2.0            | 18                | 0.850                   |
|                | FBP2    | 3IFA   | 1.9            | 16                | 0.900                   |
|                | GLS     | 3UO9   | 2.3            | 39                | 0.877                   |
| Oxidoreductase | IDH2    | 4JA8   | 1.6            | 11                | 0.937                   |
| GPCR           | CCR5    | 4MBS   | 2.7            | 24                | 0.992                   |
| Ligase         | ACC     | 1W96   | 1.8            | 32                | 0.706                   |
|                | ProRS   | 4W11   | 1.7            | 27                | 0.957                   |
| Channel        | GluN2B  | 3QEL   | 2.6            | 18                | 0.889                   |
| Cell adhesion  | LFA-1   | 3M6F   | 1.9            | 28                | 0.999                   |

<sup>a</sup>Abbreviations of proteins are the same as those in Table S1.

<sup>b</sup>AUC value is the area under an ROC curve for the screening.

**Supplementary Table S4.** The whole 100 ranked allosteric metabolites as the result of Example 1 by AlloFinder.

| Rank | Compound Id <sup>a</sup> | Allosteric metabolites                                                              | Molecule Weight (MW) | Alloscore Score <sup>b</sup> |
|------|--------------------------|-------------------------------------------------------------------------------------|----------------------|------------------------------|
| 1    | ZINC000030731390         | 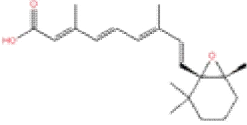   | 316.2                | 7.12                         |
| 2    | <b>ZINC000012661824</b>  |    | 302.2                | 7.04                         |
| 3    | ZINC000030731384         |    | 316.2                | 7                            |
| 4    | ZINC000012496833         |  | 316.2                | 6.98                         |
| 5    | ZINC000036766734         |  | 302.2                | 6.95                         |
| 6    | ZINC000036766734         |  | 302.2                | 6.95                         |
| 7    | ZINC000030731379         |  | 318.2                | 6.91                         |

|    |                  |                                                                                     |       |      |
|----|------------------|-------------------------------------------------------------------------------------|-------|------|
| 8  | ZINC000001697340 |    | 258.2 | 6.69 |
| 9  | ZINC000096014710 |    | 300.2 | 6.68 |
| 10 | ZINC000014685555 |    | 328.2 | 6.68 |
| 11 | ZINC000012496774 |    | 286.2 | 6.65 |
| 12 | ZINC000033943508 |  | 300.2 | 6.62 |
| 13 | ZINC000012496767 |  | 286.2 | 6.61 |
| 14 | ZINC000022066345 |  | 284.2 | 6.6  |
| 15 | ZINC000012953146 |  | 284.2 | 6.58 |

|    |                  |                                                                                     |       |      |
|----|------------------|-------------------------------------------------------------------------------------|-------|------|
| 16 | ZINC000004215527 | 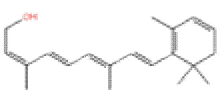   | 284.2 | 6.56 |
| 17 | ZINC000012496837 |    | 316.2 | 6.56 |
| 18 | ZINC000012358651 |    | 300.2 | 6.55 |
| 19 | ZINC000014453726 |   | 238.1 | 6.53 |
| 20 | ZINC000085664079 |  | 264.2 | 6.53 |
| 21 | ZINC000014453725 |  | 238.1 | 6.52 |
| 22 | ZINC000012496764 |  | 286.2 | 6.52 |
| 23 | ZINC000006030794 |  | 222.1 | 6.49 |

|    |                  |                                                                                     |       |      |
|----|------------------|-------------------------------------------------------------------------------------|-------|------|
| 24 | ZINC000034206309 |    | 300.2 | 6.48 |
| 25 | ZINC000015201058 |    | 222.1 | 6.47 |
| 26 | ZINC000003870195 |    | 284.2 | 6.46 |
| 27 | ZINC000034206308 |    | 300.2 | 6.46 |
| 28 | ZINC000014493252 |  | 222.1 | 6.4  |
| 29 | ZINC000014493255 |  | 222.1 | 6.38 |
| 30 | ZINC000004228262 |  | 284.2 | 6.37 |
| 31 | ZINC000015048171 |  | 252.1 | 6.36 |

|    |                  |                                                                                     |       |      |
|----|------------------|-------------------------------------------------------------------------------------|-------|------|
| 32 | ZINC000013303509 | 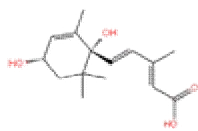   | 266.1 | 6.36 |
| 33 | ZINC000014724752 |    | 194.1 | 6.35 |
| 34 | ZINC000014724754 |    | 194.1 | 6.34 |
| 35 | ZINC000085664071 |    | 222.1 | 6.34 |
| 36 | ZINC000004801872 |  | 314.2 | 6.32 |
| 37 | ZINC000002015523 |  | 258.2 | 6.32 |
| 38 | ZINC000085664083 |  | 264.2 | 6.31 |
| 39 | ZINC000000394327 |  | 262.2 | 6.31 |

|    |                  |                                                                                     |       |      |
|----|------------------|-------------------------------------------------------------------------------------|-------|------|
| 40 | ZINC000001319187 | 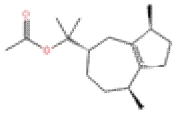   | 262.2 | 6.3  |
| 41 | ZINC000095619540 |    | 210.1 | 6.3  |
| 42 | ZINC000006037475 |    | 222.1 | 6.3  |
| 43 | ZINC000230080207 |    | 222.1 | 6.3  |
| 44 | ZINC000085664074 |  | 222.1 | 6.3  |
| 45 | ZINC000004096952 |  | 282.2 | 6.3  |
| 46 | ZINC000014411632 |  | 282.1 | 6.29 |
| 47 | ZINC000003831417 |  | 286.2 | 6.29 |

|    |                  |                                                                                     |       |      |
|----|------------------|-------------------------------------------------------------------------------------|-------|------|
| 48 | ZINC000000132915 | 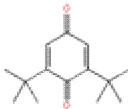   | 220.1 | 6.28 |
| 49 | ZINC000015657741 |    | 232.1 | 6.28 |
| 50 | ZINC000013783213 |    | 232.1 | 6.28 |
| 51 | ZINC000013303571 |    | 282.1 | 6.28 |
| 52 | ZINC000013303506 |  | 266.1 | 6.28 |
| 53 | ZINC000012502479 |  | 300.2 | 6.28 |
| 54 | ZINC000013303512 |  | 266.1 | 6.26 |
| 55 | ZINC000140984829 |  | 232.1 | 6.25 |



|    |                  |                                                                                     |       |      |
|----|------------------|-------------------------------------------------------------------------------------|-------|------|
| 56 | ZINC000013377435 | 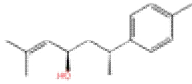   | 218.1 | 6.25 |
| 57 | ZINC000013303515 |    | 266.1 | 6.25 |
| 58 | ZINC000085757038 |    | 234.1 | 6.24 |
| 59 | ZINC000006030793 |    | 222.1 | 6.23 |
| 60 | ZINC000015201060 |  | 222.1 | 6.22 |
| 61 | ZINC000100778697 |  | 220.1 | 6.22 |
| 62 | ZINC000013415989 |  | 314.2 | 6.22 |
| 63 | ZINC000100778696 |  | 220.1 | 6.21 |

|    |                  |                                                                                     |       |      |
|----|------------------|-------------------------------------------------------------------------------------|-------|------|
| 64 | ZINC000085589170 | 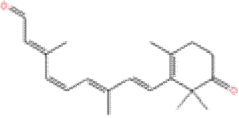   | 298.2 | 6.18 |
| 65 | ZINC000015048177 |    | 252.1 | 6.17 |
| 66 | ZINC000085925336 |    | 194.1 | 6.16 |
| 67 | ZINC000014442515 |    | 250.1 | 6.15 |
| 68 | ZINC000095618230 |  | 206.1 | 6.14 |
| 69 | ZINC000085848467 |  | 236.1 | 6.13 |
| 70 | ZINC000085874223 |  | 278.2 | 6.13 |
| 71 | ZINC000013303578 |  | 282.1 | 6.12 |

|    |                  |                                                                                     |       |      |
|----|------------------|-------------------------------------------------------------------------------------|-------|------|
| 72 | ZINC000038611118 | 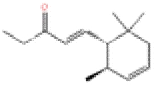   | 206.1 | 6.12 |
| 73 | ZINC000004578920 |    | 264.2 | 6.12 |
| 74 | ZINC000012417829 |    | 264.2 | 6.1  |
| 75 | ZINC000013377434 |    | 218.1 | 6.09 |
| 76 | ZINC000095618231 |  | 206.1 | 6.09 |
| 77 | ZINC000100781957 |  | 264.2 | 6.09 |
| 78 | ZINC000100778694 |  | 220.1 | 6.08 |
| 79 | ZINC000013303627 |  | 252.1 | 6.08 |

|    |                  |                                                                                     |       |      |
|----|------------------|-------------------------------------------------------------------------------------|-------|------|
| 80 | ZINC000005766979 | 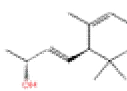   | 194.1 | 6.08 |
| 81 | ZINC000033985877 |    | 234.1 | 6.08 |
| 82 | ZINC000001531537 |    | 206.1 | 6.08 |
| 83 | ZINC000015149987 |    | 264.2 | 6.07 |
| 84 | ZINC000014724749 |  | 194.1 | 6.07 |
| 85 | ZINC000003875521 |  | 206.1 | 6.07 |
| 86 | ZINC000002584370 |  | 206.1 | 6.07 |
| 87 | ZINC000085664116 |  | 234.1 | 6.07 |

|    |                  |                                                                                     |       |      |
|----|------------------|-------------------------------------------------------------------------------------|-------|------|
| 88 | ZINC000014724750 | 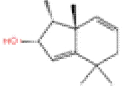   | 194.1 | 6.06 |
| 89 | ZINC000140122154 |    | 226.1 | 6.06 |
| 90 | ZINC000015207976 |    | 232.1 | 6.06 |
| 91 | ZINC000085664072 |    | 222.1 | 6.06 |
| 92 | ZINC000015149979 |  | 222.1 | 6.06 |
| 93 | ZINC000085664081 |  | 264.2 | 6.06 |
| 94 | ZINC000004578919 |  | 264.2 | 6.06 |
| 95 | ZINC000013783212 |  | 232.1 | 6.05 |

|     |                  |                                                                                     |       |      |
|-----|------------------|-------------------------------------------------------------------------------------|-------|------|
| 96  | ZINC000085664077 | 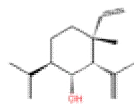   | 222.1 | 6.05 |
| 97  | ZINC000015207978 |    | 232.1 | 6.05 |
| 98  | ZINC000013303615 |    | 252.1 | 6.05 |
| 99  | ZINC000015048174 |   | 252.1 | 6.05 |
| 100 | ZINC000033953588 |  | 250.2 | 6.04 |

<sup>a</sup>Compound ID of each modulator is the same as the ID of the compound in ZINC (version 15). The known allosteric metabolite is highlighted in blue.

<sup>b</sup>Alloscore Score is calculated by the Alloscore algorithm (8).

**Supplementary Table S5.** The whole 100 ranked allosteric modulators as the result of Example 2 by AlloFinder.

| Rank | Compound Id <sup>a</sup> | Allosteric modulator                                                                | Molecule Weight (MW) | Alloscore Score <sup>b</sup> |
|------|--------------------------|-------------------------------------------------------------------------------------|----------------------|------------------------------|
| 1    | ZINC000012454396         | 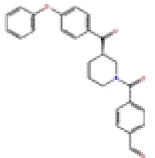   | 413.3                | 7.63                         |
| 2    | ZINC000003484557         |    | 387.3                | 7.37                         |
| 3    | <b>ZINC000000014551</b>  |    | 325.2                | 7.2                          |
| 4    | ZINC000010460579         |  | 380.3                | 7.15                         |
| 5    | ZINC000001672573         |  | 293.2                | 7.13                         |
| 6    | ZINC000002651813         |  | 279.2                | 7.07                         |
| 7    | ZINC000005515780         |  | 321.2                | 6.97                         |

|    |                  |                                                                                      |       |      |
|----|------------------|--------------------------------------------------------------------------------------|-------|------|
| 8  | ZINC000012907490 | 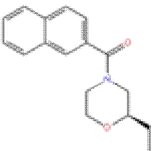    | 269.2 | 6.95 |
| 9  | ZINC000000135251 |     | 329.6 | 6.93 |
| 10 | ZINC000012769146 |     | 383.3 | 6.87 |
| 11 | ZINC000014755282 |    | 382.3 | 6.83 |
| 12 | ZINC000002020697 |   | 305.2 | 6.81 |
| 13 | ZINC000004725584 |  | 368.2 | 6.76 |
| 14 | ZINC000009987912 |   | 333.2 | 6.75 |
| 15 | ZINC000000142645 |   | 337.2 | 6.7  |



|    |                  |                                                                                     |       |      |
|----|------------------|-------------------------------------------------------------------------------------|-------|------|
| 16 | ZINC000009410579 | 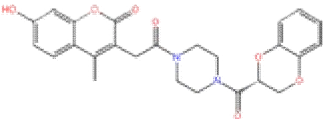  | 464.3 | 6.69 |
| 17 | ZINC000006777537 |    | 307.2 | 6.69 |
| 18 | ZINC000002696119 |    | 305.2 | 6.63 |
| 19 | ZINC000005536045 |   | 295.6 | 6.62 |
| 20 | ZINC000001446457 |  | 392.3 | 6.62 |
| 21 | ZINC000002122938 |  | 349.2 | 6.61 |
| 22 | ZINC000012810542 |  | 363.2 | 6.6  |
| 23 | ZINC000006121450 |  | 356.2 | 6.59 |

|    |                  |                                                                                     |       |      |
|----|------------------|-------------------------------------------------------------------------------------|-------|------|
| 24 | ZINC000006976394 | 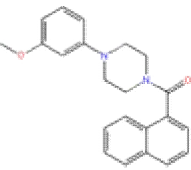   | 346.2 | 6.58 |
| 25 | ZINC000013669625 |    | 352.2 | 6.58 |
| 26 | ZINC000014882802 |    | 401.3 | 6.57 |
| 27 | ZINC000012200626 |   | 406.3 | 6.57 |
| 28 | ZINC000013154395 |  | 325.2 | 6.55 |
| 29 | ZINC000000599027 |  | 350.2 | 6.54 |
| 30 | ZINC000005672601 |  | 295.2 | 6.54 |
| 31 | ZINC000005697782 |  | 323.2 | 6.53 |

|    |                  |                                                                                      |       |      |
|----|------------------|--------------------------------------------------------------------------------------|-------|------|
| 32 | ZINC000011861546 | 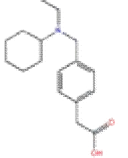    | 275.2 | 6.51 |
| 33 | ZINC000008142595 |     | 290.2 | 6.51 |
| 34 | ZINC000001619789 |     | 395.2 | 6.51 |
| 35 | ZINC000015045432 |    | 409.3 | 6.51 |
| 36 | ZINC000011753571 |  | 378.3 | 6.49 |
| 37 | ZINC000002760672 |   | 372.7 | 6.49 |
| 38 | ZINC000000122731 |   | 311.2 | 6.46 |
| 39 | ZINC000004752027 |   | 322.2 | 6.46 |

|    |                  |                                                                                     |       |      |
|----|------------------|-------------------------------------------------------------------------------------|-------|------|
| 40 | ZINC000009035184 | 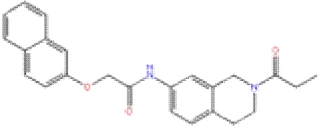  | 388.3 | 6.46 |
| 41 | ZINC000009497767 |    | 287.2 | 6.46 |
| 42 | ZINC000013185723 |    | 395.3 | 6.45 |
| 43 | ZINC000010227811 |   | 355.2 | 6.44 |
| 44 | ZINC000003880343 |  | 281.2 | 6.43 |
| 45 | ZINC000005235524 |  | 311.2 | 6.43 |
| 46 | ZINC000005102075 |  | 347.7 | 6.42 |
| 47 | ZINC000014396620 |  | 303.2 | 6.41 |

|    |                  |                                                                                     |       |      |
|----|------------------|-------------------------------------------------------------------------------------|-------|------|
| 48 | ZINC000009983384 | 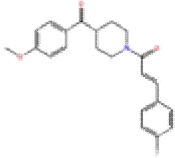   | 367.2 | 6.4  |
| 49 | ZINC000015063239 |    | 397.3 | 6.38 |
| 50 | ZINC000013709298 |    | 312.2 | 6.37 |
| 51 | ZINC000000898765 |   | 295.2 | 6.37 |
| 52 | ZINC000010775710 |  | 352.2 | 6.37 |
| 53 | ZINC000008570308 |  | 275.2 | 6.36 |
| 54 | ZINC000006468367 |  | 275.2 | 6.36 |
| 55 | ZINC000001083454 |  | 368.1 | 6.36 |

|    |                  |                                                                                     |       |      |
|----|------------------|-------------------------------------------------------------------------------------|-------|------|
| 56 | ZINC000005843999 | 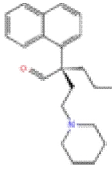   | 323.2 | 6.36 |
| 57 | ZINC000000202023 |    | 296.2 | 6.36 |
| 58 | ZINC000007115860 |    | 324.2 | 6.35 |
| 59 | ZINC000004689526 |   | 396.3 | 6.35 |
| 60 | ZINC000000000681 |  | 245.2 | 6.33 |
| 61 | ZINC000012292520 |  | 395.2 | 6.33 |
| 62 | ZINC000009188298 |  | 337.2 | 6.3  |
| 63 | ZINC000014746818 |  | 425.3 | 6.3  |

|    |                  |                                                                                     |       |      |
|----|------------------|-------------------------------------------------------------------------------------|-------|------|
| 64 | ZINC000009547646 | 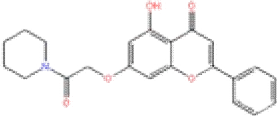   | 379.2 | 6.3  |
| 65 | ZINC000006471396 |    | 263.2 | 6.29 |
| 66 | ZINC000012567989 |    | 305.2 | 6.28 |
| 67 | ZINC000008415961 |   | 340.2 | 6.27 |
| 68 | ZINC000006175576 |  | 283.2 | 6.26 |
| 69 | ZINC000000808190 |  | 319.2 | 6.26 |
| 70 | ZINC000006982754 |  | 328.2 | 6.26 |
| 71 | ZINC000003355892 |  | 444.1 | 6.26 |

|    |                  |                                                                                     |       |      |
|----|------------------|-------------------------------------------------------------------------------------|-------|------|
| 72 | ZINC000005079221 | 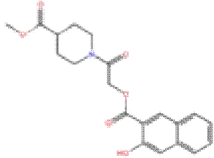   | 371.2 | 6.26 |
| 73 | ZINC000001480343 |    | 281.6 | 6.23 |
| 74 | ZINC000000473873 |    | 281.6 | 6.23 |
| 75 | ZINC000012034317 |   | 290.2 | 6.22 |
| 76 | ZINC000008360937 |  | 324.2 | 6.22 |
| 77 | ZINC000012207068 |  | 379.2 | 6.22 |
| 78 | ZINC000003237214 |  | 367.3 | 6.21 |
| 79 | ZINC000012974265 |  | 247.2 | 6.21 |



|    |                  |                                                                                     |       |      |
|----|------------------|-------------------------------------------------------------------------------------|-------|------|
| 80 | ZINC000011817411 | 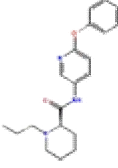   | 339.2 | 6.2  |
| 81 | ZINC000014992436 |    | 341.2 | 6.2  |
| 82 | ZINC000002694403 |    | 319.2 | 6.19 |
| 83 | ZINC000006624264 |  | 420.3 | 6.18 |
| 84 | ZINC000001844767 |  | 253.2 | 6.17 |
| 85 | ZINC000002456988 |  | 398.2 | 6.17 |
| 86 | ZINC000012227333 |  | 365.2 | 6.16 |
| 87 | ZINC000007620349 |  | 339.2 | 6.16 |

|    |                  |                                                                                     |       |      |
|----|------------------|-------------------------------------------------------------------------------------|-------|------|
| 88 | ZINC000005967438 | 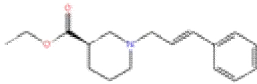   | 273.2 | 6.15 |
| 89 | ZINC000012588866 |    | 385.7 | 6.15 |
| 90 | ZINC000003747794 |    | 355.2 | 6.15 |
| 91 | ZINC000001466537 |   | 245.2 | 6.14 |
| 92 | ZINC000010113682 |  | 338.2 | 6.14 |
| 93 | ZINC000005735275 |  | 359.7 | 6.14 |
| 94 | ZINC000008299601 |  | 344.2 | 6.14 |
| 95 | ZINC000005160488 |  | 354.2 | 6.14 |

|     |                  |                                                                                     |       |      |
|-----|------------------|-------------------------------------------------------------------------------------|-------|------|
| 96  | ZINC000000438151 | 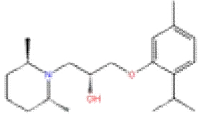   | 319.2 | 6.13 |
| 97  | ZINC000003760644 |    | 315.2 | 6.13 |
| 98  | ZINC000008025580 |    | 350.2 | 6.12 |
| 99  | ZINC000011955293 |   | 373.7 | 6.12 |
| 100 | ZINC000002277989 |  | 334.2 | 6.12 |

<sup>a</sup>Compound ID of each modulator is the same as the ID of the compound in ZINC (version 15). The known allosteric modulator is highlighted in blue.

<sup>b</sup>Alloscore Score is calculated by the Alloscore algorithm (8).

**Supplementary Table S6.** The whole 100 ranked allosteric modulators as the result of STAT3 by AlloFinder.

| Rank | Compound Id <sup>a</sup>     | Allosteric modulator                                                                 | Molecule Weight (MW) | Alloscore Score <sup>b</sup> |
|------|------------------------------|--------------------------------------------------------------------------------------|----------------------|------------------------------|
| 1    | Specs_AT-057_42304490        | 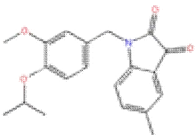   | 339.2                | 5.28                         |
| 2    | Specs_AT-057_42304548        |     | 295.2                | 5.25                         |
| 3    | Specs_AP-853_41269897        |    | 382.3                | 5.09                         |
| 4    | Specs_AP-064_41684622        |   | 306.6                | 4.85                         |
| 5    | Specs_AR-270_43409614        |   | 246.2                | 4.79                         |
| 6    | <b>Specs_AH-034_11963955</b> |  | 278.2                | 4.11                         |
| 7    | Specs_AN-329_40275188        |   | 252.2                | 4.1                          |

|    |                       |                                                                                      |       |      |
|----|-----------------------|--------------------------------------------------------------------------------------|-------|------|
| 8  | Specs_AS-871_43475754 | 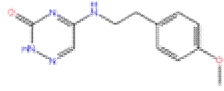   | 248.2 | 4.1  |
| 9  | Specs_AO-476_43250228 |    | 427.3 | 4.1  |
| 10 | Specs_AS-871_40340909 |    | 298.2 | 4.1  |
| 11 | Specs_AS-871_43239534 |    | 421.7 | 4.1  |
| 12 | Specs_AE-848_42278486 |  | 288.2 | 4.09 |
| 13 | Specs_AK-968_15605076 |  | 281.6 | 4.09 |
| 14 | Specs_AG-690_40750303 |  | 369.3 | 4.09 |
| 15 | Specs_AK-968_37156099 |  | 264.2 | 4.09 |

|    |                       |                                                                                      |       |      |
|----|-----------------------|--------------------------------------------------------------------------------------|-------|------|
| 16 | Specs_AI-204_43372123 | 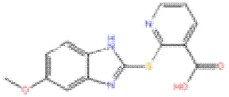   | 305.2 | 4.09 |
| 17 | Specs_AO-476_43417608 |    | 346.3 | 4.09 |
| 18 | Specs_AT-057_43468141 |    | 303.2 | 4.09 |
| 19 | Specs_AP-185_43377638 |    | 211.1 | 4.09 |
| 20 | Specs_AS-871_43170215 |  | 324.2 | 4.09 |
| 21 | Specs_AO-080_43441540 |   | 292.6 | 4.08 |
| 22 | Specs_AT-057_40822043 |  | 369.3 | 4.08 |
| 23 | Specs_AS-871_43477158 |  | 315.2 | 4.08 |

|    |                       |                                                                                      |       |      |
|----|-----------------------|--------------------------------------------------------------------------------------|-------|------|
| 24 | Specs_AN-648_15240030 | 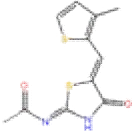    | 268.3 | 4.08 |
| 25 | Specs_AN-919_14790018 |    | 317.3 | 4.08 |
| 26 | Specs_AK-968_10815012 |     | 289.2 | 4.08 |
| 27 | Specs_AO-081_42298135 |    | 373.3 | 4.07 |
| 28 | Specs_AP-970_43492187 |  | 204.1 | 4.07 |
| 29 | Specs_AS-871_43475091 |  | 424.3 | 4.07 |
| 30 | Specs_AS-871_43478445 |  | 302.3 | 4.06 |
| 31 | Specs_AK-968_15605868 |  | 304.2 | 4.06 |

|    |                       |                                                                                     |       |      |
|----|-----------------------|-------------------------------------------------------------------------------------|-------|------|
| 32 | Specs_AG-205_32458033 | 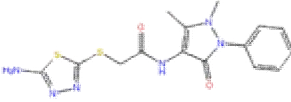  | 380.4 | 4.06 |
| 33 | Specs_AH-034_07286049 |   | 344.3 | 4.06 |
| 34 | Specs_AK-968_37005275 |   | 298   | 4.06 |
| 35 | Specs_AK-968_36977127 |   | 232.1 | 4.06 |
| 36 | Specs_AN-655_15531018 |  | 194.1 | 4.06 |
| 37 | Specs_AG-205_11957309 |  | 260.2 | 4.06 |
| 38 | Specs_AG-690_40144611 |  | 307.2 | 4.06 |
| 39 | Specs_AE-848_34078025 |  | 309.2 | 4.06 |



|    |                       |                                                                                      |       |      |
|----|-----------------------|--------------------------------------------------------------------------------------|-------|------|
| 40 | Specs_AH-487_34187016 | 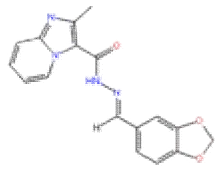   | 326.2 | 4.06 |
| 41 | Specs_AN-329_09187036 |    | 264.6 | 4.06 |
| 42 | Specs_AE-848_13005012 |    | 466.4 | 4.06 |
| 43 | Specs_AR-270_43409754 |     | 166.1 | 4.05 |
| 44 | Specs_AS-871_43476174 |  | 264.2 | 4.05 |
| 45 | Specs_AN-758_13664004 |   | 457.3 | 4.05 |
| 46 | Specs_AM-900_15050008 |  | 285.2 | 4.05 |
| 47 | Specs_AT-057_41349241 |   | 319.3 | 4.05 |

|    |                       |                                                                                      |       |      |
|----|-----------------------|--------------------------------------------------------------------------------------|-------|------|
| 48 | Specs_AT-057_42189162 | 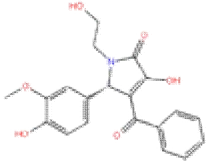   | 369.2 | 4.05 |
| 49 | Specs_AN-988_40679903 |    | 401.3 | 4.05 |
| 50 | Specs_AG-690_33250063 |     | 362.2 | 4.05 |
| 51 | Specs_AF-399_41753362 |    | 287.2 | 4.05 |
| 52 | Specs_AO-365_43368513 |   | 392.3 | 4.04 |
| 53 | Specs_AI-204_31720039 |  | 356.3 | 4.04 |
| 54 | Specs_AK-968_41170900 |  | 449.3 | 4.04 |
| 55 | Specs_AG-205_33159015 |  | 297.2 | 4.04 |

|    |                       |                                                                                      |       |      |
|----|-----------------------|--------------------------------------------------------------------------------------|-------|------|
| 56 | Specs_AH-487_41660228 | 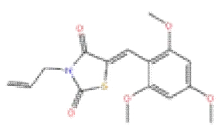   | 335.2 | 4.03 |
| 57 | Specs_AE-848_36255015 |    | 346.3 | 4.03 |
| 58 | Specs_AG-690_11636562 |     | 370.2 | 4.03 |
| 59 | Specs_AK-968_12117115 |   | 362.3 | 4.03 |
| 60 | Specs_AN-988_40680531 |  | 406.3 | 4.03 |
| 61 | Specs_AK-918_11909063 |   | 257.2 | 4.02 |
| 62 | Specs_AN-652_11760408 |   | 255.2 | 4.02 |
| 63 | Specs_AP-970_43012288 |  | 341.3 | 4.02 |

|    |                       |                                                                                      |       |      |
|----|-----------------------|--------------------------------------------------------------------------------------|-------|------|
| 64 | Specs_AH-487_41663592 | 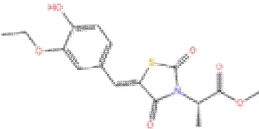   | 351.2 | 4.02 |
| 65 | Specs_AN-698_40718564 |     | 368.3 | 4.02 |
| 66 | Specs_AG-690_03036047 |    | 339.2 | 4.02 |
| 67 | Specs_AK-968_41922043 |    | 308.3 | 4.02 |
| 68 | Specs_AN-329_42504558 |   | 312.3 | 4.02 |
| 69 | Specs_AP-970_43374117 |  | 256.2 | 4.02 |
| 70 | Specs_AK-968_41926710 |  | 285.2 | 4.02 |
| 71 | Specs_AK-968_37171079 |  | 252.1 | 4.02 |

|    |                       |                                                                                      |       |      |
|----|-----------------------|--------------------------------------------------------------------------------------|-------|------|
| 72 | Specs_AO-022_41399309 | 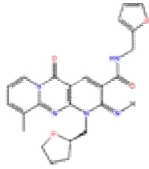    | 437.3 | 4.02 |
| 73 | Specs_AJ-292_12641038 |     | 413.3 | 4.02 |
| 74 | Specs_AK-968_40340372 |    | 405.7 | 4.02 |
| 75 | Specs_AK-968_41017619 |    | 397.3 | 4.01 |
| 76 | Specs_AN-329_40602098 |   | 242.2 | 4.01 |
| 77 | Specs_AS-871_43478439 |  | 350.3 | 4.01 |
| 78 | Specs_AM-879_11808031 |  | 426.3 | 4.01 |
| 79 | Specs_AG-690_36169011 |   | 281.1 | 4    |

|    |                       |                                                                                     |       |   |
|----|-----------------------|-------------------------------------------------------------------------------------|-------|---|
| 80 | Specs_AS-871_43477393 | 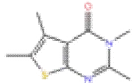   | 210.2 | 4 |
| 81 | Specs_AG-690_11634414 |    | 292.1 | 4 |
| 82 | Specs_AF-399_40714847 |    | 312.6 | 4 |
| 83 | Specs_AN-652_11380105 |   | 315.2 | 4 |
| 84 | Specs_AG-670_34988020 |  | 351.6 | 4 |
| 85 | Specs_AK-968_40734154 |  | 281.3 | 4 |
| 86 | Specs_AK-968_15256326 |  | 300.2 | 4 |
| 87 | Specs_AK-778_41182446 |  | 354.2 | 4 |

|    |                       |                                                                                      |       |      |
|----|-----------------------|--------------------------------------------------------------------------------------|-------|------|
| 88 | Specs_AG-690_36808019 | 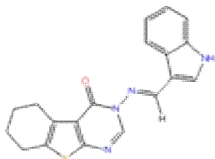   | 352.3 | 4    |
| 89 | Specs_AJ-333_36115046 |     | 186.2 | 3.99 |
| 90 | Specs_AE-848_11104122 |     | 365.3 | 3.99 |
| 91 | Specs_AN-648_40682186 |    | 303.2 | 3.99 |
| 92 | Specs_AN-465_43369870 |  | 317.2 | 3.99 |
| 93 | Specs_AS-871_43475282 |  | 369.3 | 3.99 |
| 94 | Specs_AP-906_40900953 |  | 268.2 | 3.98 |
| 95 | Specs_AG-690_11171282 |   | 355.2 | 3.98 |

|     |                       |                                                                                      |       |      |
|-----|-----------------------|--------------------------------------------------------------------------------------|-------|------|
| 96  | Specs_AT-057_43468823 | 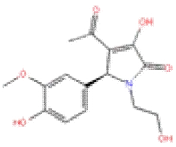    | 307.2 | 3.98 |
| 97  | Specs_AT-057_40126903 |    | 316.3 | 3.98 |
| 98  | Specs_AN-329_40067267 |     | 219.1 | 3.98 |
| 99  | Specs_AH-487_41657738 |   | 382.3 | 3.98 |
| 100 | Specs_AP-853_42939736 |  | 326.3 | 3.98 |

<sup>a</sup>Compound ID of each modulator is the same as the ID of the compound in SPECS (<http://www.specs.net>). The active allosteric inhibitor of STAT3 found in the study is highlighted in blue.

<sup>b</sup>Alloscore Score is calculated by the Alloscore algorithm (8).

## Reference

1. Sterling, T. and Irwin, J.J. (2015) ZINC 15—ligand discovery for everyone. *J. Chem. Inf. Model.*, **55**, 2324–2337. DOI:10.1021/acs.jcim.5b0055
2. Gaulton, A., Hersey, A., Patr, A., Chambers, J., Mendez, D., Motowo, P., Atkinson, F., Bellis, L.J., Cibri, E., Davies, M., *et al.* (2017) The ChEMBL database in 2017. *Nucleic Acids Res.*, **45**, D945–D954. DOI:10.1093/nar/gkw1074
3. Ihlenfeldt, W.D., Voigt, J.H., Bienfait, B., Oellien, F. and Nicklaus, M.C. (2002) Enhanced CACTVS browser of the Open NCI Database. *J. Chem. Inf. Comput. Sci.*, **42**, 46–57. DOI:10.1021/ci010056s
4. Huang, W., Lu, S., Huang, Z., Liu, X., Mou, L., Luo, Y., Zhao, Y., Liu, Y., Chen, Z., Hou, T. and Zhang, J. (2013) Allosite: A method for predicting allosteric sites. *Bioinformatics*, **29**, 2357–2359. DOI:10.1093/bioinformatics/btt399



5. Song,K., Liu,X., Huang,W., Lu,S., Shen,Q., Zhang,L. and Zhang,J. (2017) Improved Method for the Identification and Validation of Allosteric Sites. *J. Chem. Inf. Model.*, **57**, 2358–2363. DOI:10.1021/acs.jcim.7b00014
6. Chen,J. and Lai,L. (2006) Pocket v.2: Further developments on receptor-based pharmacophore modeling. *J. Chem. Inf. Model.*, **46**, 2684–2691. DOI:10.1021/ci600246s
7. Wang,R., Lu,Y. and Wang,S. (2003) Comparative evaluation of 11 scoring functions for molecular docking. *J. Med. Chem.*, **46**, 2287–2303. DOI:10.1021/jm0203783
8. Li,S., Shen,Q., Su,M., Liu,X., Lu,S., Chen,Z., Wang,R. and Zhang,J. (2016) Alloscore: A method for predicting allosteric ligand-protein interactions. *Bioinformatics*, **32**, 1574–1576. DOI:10.1093/bioinformatics/btw036
9. Gao,M. and Skolnick,J. (2013) APoc: large-scale identification of similar protein pockets. *Bioinformatics*, **29**, 597–604. DOI: 10.1093/bioinformatics/btt024
10. Paradis,E., Claude,J. and Strimmer,K. (2004) APE: Analyses of Phylogenetics and Evolution in R language. *Bioinformatics*, **20**, 289-290. DOI:10.1093/bioinformatics/btg412
11. O’Boyle,N.M., Banck,M., James,C.A., Morley,C., Vandermeersch,T. and Hutchison,G.R. (2011) Open Babel: an open chemical toolbox. *J. Cheminf.*, **3**, 33. DOI:10.1186/1758-2946-3-33
12. O’Boyle,N.M., Morley,C. and Hutchison,G.R. (2008) Pybel: a Python wrapper for the OpenBabel cheminformatics toolkit. *Chem. Cent. J.*, **2**, 5. DOI:10.1186/1752-153X-2-5
13. Kanehisa,M. and Goto,S. (2000) KEGG: kyoto encyclopedia of genes and genomes. *Nucleic Acids Res.*, **28**, 27–30. DOI:10.1093/nar/28.1.27
14. Huang,M., Chen,Z., Zhang,L., Huang,Z., Chen,Y., Xu,J., Zhang,J. and Shu,X. (2016) Screening and biological evaluation of a novel STAT3 signaling pathway inhibitor against cancer. *Bioorganic & Medicinal Chemistry Letters.*, **26**, 5172-5176. DOI:10.1016/j.bmcl.2016.09.073
15. Forouhar,F., Anderson,J.L.R., Mowat,C.G., Vorobiev,S.M., Hussain,A., Abashidze,M., Bruckmann,C., Thackray,S.J., Seetharaman,J., Tucker,T., *et al.*

- (2007) Molecular insights into substrate recognition and catalysis by tryptophan 2,3-dioxygenase. *Proc. Natl. Acad. Sci.*, **104**, 473–478. DOI:10.1073/pnas.0610007104
16. Karakas,E., Simorowski,N. and Furukawa,H. (2011) Subunit arrangement and phenylethanolamine binding in GluN1/GluN2B NMDA receptors. *Nature*, **475**, 249–253. DOI:10.1038/nature10180
17. Roy,A., Srinivasan,B. and Skolnick,J. (2015) PoLi: a virtual screening pipeline based on template pocket and ligand similarity. *J. Chem. Inf. Model.*, **55**, 1757-1770. DOI: 10.1021/acs.jcim.5b00232
